# Supplementary material
Source: PubMed Central journal article supplement (PMC11028827)
Supplement: 262_2015_1753_MOESM1_ESM.pdf [file 262_2015_1753_MOESM1_ESM.pdf]

**Supplemental Table S1. Genes studied**

| Gene          | Chr. | Start (bp)  | Size (kb) | GeneID | RefSeq      | Description                      | Sub-Pathway | Genotyping reference (see footnotes) | N SNPs | N PCs | % Variation from PC |
|---------------|------|-------------|-----------|--------|-------------|----------------------------------|-------------|--------------------------------------|--------|-------|---------------------|
| <i>ACVR2B</i> | 3    | 38,470,794  | 38.8      | 93     | NM_001106.3 | activin A receptor, type IIB     | Induction   | 1                                    | 19     | 5     | 93.5%               |
| <i>AGTR1</i>  | 3    | 149,898,348 | 45.1      | 185    | NM_000685.4 | angiotensin II receptor, type 1  | Induction   | 1                                    | 35     | 8     | 90.7%               |
| <i>CCL11</i>  | 17   | 29,636,800  | 2.5       | 6356   | NM_002986.2 | chemokine (C-C motif) ligand 11  | Trafficking | 1                                    | 14     | 6     | 95.4%               |
| <i>CCL17</i>  | 16   | 55,996,180  | 11.3      | 6361   | NM_002987.2 | chemokine (C-C motif) ligand 17  | Trafficking | 1                                    | 9      | 6     | 97.9%               |
| <i>CCL19</i>  | 9    | 34,679,567  | 1.7       | 6363   | NM_006274.2 | chemokine (C-C motif) ligand 19  | Trafficking | 1                                    | 9      | 3     | 95.7%               |
| <i>CCL2</i>   | 17   | 29,606,409  | 1.9       | 6347   | NM_002982.3 | chemokine (C-C motif) ligand 2   | Trafficking | 1                                    | 12     | 5     | 93.2%               |
| <i>CCL20</i>  | 2    | 228,386,814 | 3.7       | 6364   | NM_004591.1 | chemokine (C-C motif) ligand 20  | Trafficking | 1                                    | 3      | 2     | 96.1%               |
| <i>CCL22</i>  | 16   | 55,950,219  | 7.4       | 6367   | NM_002990.3 | chemokine (C-C motif) ligand 22  | Trafficking | 1                                    | 9      | 3     | 95.0%               |
| <i>CCL3</i>   | 17   | 31,439,715  | 1.9       | 6348   | NM_002983.2 | chemokine (C-C motif) ligand 3   | Trafficking | 1                                    | 9      | 3     | 95.2%               |
| <i>CCL4</i>   | 17   | 31,455,333  | 1.8       | 6351   | NM_002984.2 | chemokine (C-C motif) ligand 4   | Trafficking | 1                                    | 8      | 5     | 97.8%               |
| <i>CCL5</i>   | 17   | 31,222,608  | 8.9       | 6352   | NM_002985.2 | chemokine (C-C motif) ligand 5   | Trafficking | 1                                    | 4      | 2     | 93.9%               |
| <i>CCR4</i>   | 3    | 32,968,070  | 3.3       | 1233   | NM_005508.4 | chemokine (C-C motif) receptor 4 | Trafficking | 1                                    | 4      | 2     | 94.4%               |
| <i>CCR6</i>   | 6    | 167,445,285 | 27.3      | 1235   | NM_004367.5 | chemokine (C-C motif) receptor 6 | Trafficking | 1                                    | 39     | 13    | 91.3%               |
| <i>CCR7</i>   | 17   | 35,963,547  | 11.7      | 1236   | NM_001838.2 | chemokine (C-C motif) receptor 7 | Trafficking | 1                                    | 8      | 7     | 95.7%               |
| <i>CCR8</i>   | 3    | 39,346,219  | 4.9       | 1237   | NM_005201.2 | chemokine (C-C motif) receptor 8 | Trafficking | 1                                    | 4      | 3     | 99.0%               |

|               |    |              |       |       |                |                                                            |                      |       |    |    |        |
|---------------|----|--------------|-------|-------|----------------|------------------------------------------------------------|----------------------|-------|----|----|--------|
| <i>CD274</i>  | 9  | 5,440,559    | 17.9  | 29126 | NM_014143.2    | CD274 molecule                                             | Suppressive Function | 1     | 29 | 9  | 91.8%  |
| <i>CD28</i>   | 2  | 204,571,198  | 31.4  | 940   | NM_006139.1    | CD28 molecule                                              | Induction            | 2     | 4  | 4  | 100.0% |
| <i>CD46</i>   | 1  | 205,992,025  | 43.5  | 4179  | NM_002389.3    | CD46 molecule, complement regulatory protein               | Induction            | 1     | 17 | 6  | 94.4%  |
| <i>CD80</i>   | 3  | 120,725,830  | 35.3  | 941   | NM_005191.3    | CD80 molecule                                              | Induction            | 1     | 50 | 11 | 90.2%  |
| <i>CD86</i>   | 3  | 123,256,911  | 65.8  | 942   | NM_175862.3    | CD86 molecule                                              | Induction            | 1     | 42 | 11 | 90.6%  |
| <i>CTLA4</i>  | 2  | 204,732,,509 | 6.2   | 1493  | NM_005214.3    | cytotoxic T-lymphocyte-associated protein 4                | Induction            | 2     | 7  | 3  | 90.3%  |
| <i>CXCL10</i> | 4  | 77,161,295   | 2.4   | 3627  | NM_001565.2    | chemokine (C-X-C motif) ligand 10                          | Trafficking          | 1     | 8  | 5  | 99.8%  |
| <i>CXCL13</i> | 4  | 78,651,931   | 100.1 | 10563 | NM_006419.1    | chemokine (C-X-C motif) ligand 13 (B-cell chemoattractant) | Trafficking          | 1     | 23 | 9  | 91.4%  |
| <i>CXCR5</i>  | 11 | 118,259,777  | 12.4  | 643   | NM_001716.2    | chemokine (C-X-C motif) receptor 5                         | Trafficking          | 1     | 16 | 7  | 92.1%  |
| <i>DUSP4</i>  | 8  | 29,249,530   | 14.6  | 1846  | NM_001394.5    | dual specificity phosphatase 4                             | ND                   | 1     | 14 | 3  | 90.4%  |
| <i>EGR2</i>   | 10 | 64,241,763   | 4.4   | 1959  | NM_000399.2    | early growth response 2 (Krox-20 homolog, Drosophila)      | Suppressive Function | 1     | 8  | 3  | 96.3%  |
| <i>FOXP3</i>  | X  | 49,106,897   | 14.4  | 50943 | NM_014009.2    | forkhead box P3                                            | Suppressive Function | 2     | 4  | 2  | 98.8%  |
| <i>GPR83</i>  | 11 | 93,750,131   | 23.9  | 10888 | NM_016540.2    | G protein-coupled receptor 83                              | Induction            | 1     | 21 | 4  | 92.0%  |
| <i>IDO1</i>   | 8  | 39,771,328   | 14.6  | 3620  | NM_002164.4    | indoleamine 2,3-dioxygenase 1                              | Induction            | 1 & 2 | 17 | 6  | 93.8%  |
| <i>IKZF2</i>  | 2  | 213,572,653  | 151.9 | 22807 | NM_001079526.1 | IKAROS family zinc finger 2 (Helios)                       | ND                   | 1     | 54 | 12 | 90.8%  |
| <i>IKZF4</i>  | 12 | 54,700,956   | 17.5  | 64375 | NM_022465.3    | IKAROS family                                              | Induction            | 1     | 5  | 3  | 99.2%  |

|               |    |             |      |        |             | zinc finger 4 (Eos)                                                     |                         |   |    |    |        |
|---------------|----|-------------|------|--------|-------------|-------------------------------------------------------------------------|-------------------------|---|----|----|--------|
| <i>IL10</i>   | 1  | 206,940,948 | 4.9  | 3586   | NM_000572.2 | interleukin 10                                                          | Induction               | 2 | 3  | 3  | 100.0% |
| <i>IL10RA</i> | 11 | 117,857,106 | 15.1 | 3587   | NM_001558.2 | interleukin 10<br>receptor, alpha                                       | Induction               | 2 | 15 | 3  | 93.1%  |
| <i>IL10RB</i> | 21 | 33,560,542  | 30.8 | 3588   | NM_000628.3 | interleukin 10<br>receptor, beta                                        | Induction               | 1 | 26 | 8  | 91.3%  |
| <i>IL15</i>   | 4  | 142,557,754 | 96.9 | 3600   | NM_000585.2 | interleukin 15                                                          | Induction               | 2 | 7  | 5  | 99.9%  |
| <i>IL15RA</i> | 10 | 6,034,340   | 25.8 | 3601   | NM_172200.1 | interleukin 15<br>receptor, alpha                                       | Induction               | 1 | 32 | 9  | 91.2%  |
| <i>IL17RA</i> | 22 | 17,565,849  | 25.6 | 23765  | NM_014339.4 | interleukin 17<br>receptor A                                            | ND                      | 2 | 21 | 8  | 92.2%  |
| <i>IL23A</i>  | 12 | 56,732,663  | 1.5  | 51561  | NM_016584.2 | interleukin 23,<br>alpha subunit p19                                    | ND                      | 2 | 1  | 1  | 100.0% |
| <i>IL23R</i>  | 1  | 67,632,169  | 93.5 | 149233 | NM_144701.2 | interleukin 23<br>receptor                                              | ND                      | 2 | 59 | 7  | 92.8%  |
| <i>IL2RA</i>  | 10 | 6,052,657   | 51.7 | 3559   | NM_000417.1 | interleukin 2<br>receptor, alpha                                        | ND                      | 2 | 54 | 10 | 90.9%  |
| <i>IL2RB</i>  | 22 | 35,851,824  | 24.1 | 3560   | NM_000878.2 | interleukin 2<br>receptor, beta                                         | Induction               | 1 | 33 | 11 | 91.1%  |
| <i>IL6</i>    | 7  | 22,766,766  | 4.9  | 3569   | NM_000600.2 | interleukin 6<br>(interferon, beta 2)                                   | Induction               | 2 | 1  | 1  | 100.0% |
| <i>IL6R</i>   | 1  | 154,377,669 | 62.5 | 3570   | NM_000565.2 | interleukin 6<br>receptor                                               | Induction               | 2 | 32 | 4  | 91.5%  |
| <i>IL6ST</i>  | 5  | 55,272,451  | 54.1 | 3572   | NM_002184.2 | interleukin 6 signal<br>transducer (gp130,<br>oncostatin M<br>receptor) | Induction               | 1 | 8  | 3  | 91.7%  |
| <i>IL8</i>    | 4  | 74,606,275  | 3.2  | 3576   | NM_000584.2 | interleukin 8                                                           | Trafficking             | 2 | 3  | 2  | 98.2%  |
| <i>IL9</i>    | 5  | 135,255,834 | 3.6  | 3578   | NM_000590.1 | interleukin 9                                                           | Suppressive<br>Function | 1 | 11 | 5  | 92.3%  |
| <i>INHBA</i>  | 7  | 41,695,126  | 14.1 | 3624   | NM_002192.2 | inhibin, beta A                                                         | Induction               | 1 | 9  | 4  | 92.5%  |
| <i>INHBB</i>  | 2  | 120,820,189 | 5.7  | 3625   | NM_002193.2 | inhibin, beta B                                                         | Induction               | 1 | 12 | 7  | 94.1%  |
| <i>IRF4</i>   | 6  | 336,760     | 19.4 | 3662   | NM_002460.1 | interferon<br>regulatory factor 4                                       | ND                      | 1 | 23 | 7  | 91.1%  |
| <i>ITGAE</i>  | 17 | 3,564,668   | 86.6 | 3682   | NM_002208.4 | integrin, alpha E                                                       | Trafficking             | 1 | 60 | 18 | 90.8%  |

|                 |    |             |       |       |                |                                                      |                      |   |     |    |       |
|-----------------|----|-------------|-------|-------|----------------|------------------------------------------------------|----------------------|---|-----|----|-------|
|                 |    |             |       |       |                | (antigen CD103)                                      |                      |   |     |    |       |
| <i>KLF10</i>    | 8  | 103,730,188 | 6.9   | 7071  | NM_005655.1    | Kruppel-like factor 10                               | Induction            | 1 | 13  | 6  | 92.7% |
| <i>LAG3</i>     | 12 | 6,751,931   | 5.9   | 3902  | NM_002286.4    | lymphocyte-activation gene 3                         | Suppressive Function | 1 | 10  | 6  | 93.5% |
| <i>LGALS1</i>   | 22 | 38,071,613  | 4.2   | 3956  | NM_002305.3    | lectin, galactoside-binding, soluble, 1              | ND                   | 2 | 3   | 1  | 92.6% |
| <i>LGALS9</i>   | 17 | 25,958,174  | 18.4  | 3965  | NM_002308.3    | lectin, galactoside-binding, soluble, 9              | ND                   | 2 | 11  | 2  | 92.5% |
| <i>LRRC32</i>   | 11 | 76,046,222  | 12.3  | 2615  | NM_005512.1    | leucine rich repeat containing 32                    | Suppressive Function | 1 | 32  | 8  | 90.2% |
| <i>MAP3K8</i>   | 10 | 30,722,866  | 27.9  | 1326  | NM_005204.2    | mitogen-activated protein kinase kinase kinase 8     | ND                   | 2 | 6   | 2  | 94.3% |
| <i>MDFIC</i>    | 7  | 114,349,445 | 97.1  | 29969 | NM_199072.3    | MyoD family inhibitor domain containing              | ND                   | 1 | 45  | 10 | 90.5% |
| <i>NRP1</i>     | 10 | 33,506,432  | 157.4 | 8829  | NM_003873.4    | neuropilin 1                                         | Suppressive Function | 1 | 141 | 22 | 90.2% |
| <i>PDCD1</i>    | 2  | 242,440,711 | 9     | 5133  | NM_005018.1    | programmed cell death 1                              | Suppressive Function | 1 | 9   | 4  | 95.9% |
| <i>PLAGL1</i>   | 6  | 144,303,130 | 124.3 | 5325  | NM_001080951.1 | pleiomorphic adenoma gene-like 1                     | ND                   | 1 | 79  | 16 | 90.0% |
| <i>PRNP</i>     | 20 | 4,614,797   | 15.4  | 5621  | NM_000311.3    | prion protein (p27-30)                               | ND                   | 1 | 19  | 7  | 92.8% |
| <i>RGS1</i>     | 1  | 190,811,480 | 4.3   | 5996  | NM_002922.3    | regulator of G-protein signaling 1                   | Trafficking          | 1 | 13  | 7  | 93.6% |
| <i>RGS16</i>    | 1  | 180,834,381 | 5.8   | 6004  | NM_002928.3    | regulator of G-protein signaling 16                  | ND                   | 1 | 8   | 5  | 92.3% |
| <i>SH3BGRL2</i> | 6  | 80,397,719  | 72.4  | 83699 | NM_031469.2    | SH3 domain binding glutamic acid-rich protein like 2 | ND                   | 1 | 42  | 9  | 91.4% |
| <i>SLC22A2</i>  | 6  | 160,557,780 | 42.2  | 6582  | NM_003058.2    | solute carrier                                       | ND                   | 1 | 27  | 7  | 92.4% |

|                 |    |             |       |      |             |                                                         |                      |   |     |    |       |
|-----------------|----|-------------|-------|------|-------------|---------------------------------------------------------|----------------------|---|-----|----|-------|
|                 |    |             |       |      |             | family 22 (organic cation transporter), member 2        |                      |   |     |    |       |
| <i>SMAD3</i>    | 15 | 65,145,249  | 129.3 | 4088 | NM_005902.3 | SMAD family member 3                                    | Induction            | 1 | 95  | 22 | 90.2% |
| <i>SOCS2</i>    | 12 | 92,487,729  | 6.4   | 8835 | NM_003877.3 | suppressor of cytokine signaling 2                      | ND                   | 1 | 8   | 3  | 96.3% |
| <i>STAT5A</i>   | 17 | 40,439,565  | 24.4  | 6776 | NM_003152.2 | signal transducer and activator of transcription 5A     | ND                   | 2 | 7   | 2  | 99.7% |
| <i>STAT5B</i>   | 17 | 40,351,195  | 77.2  | 6777 | NM_012448.3 | signal transducer and activator of transcription 5B     | ND                   | 2 | 16  | 3  | 93.7% |
| <i>TGFB1</i>    | 19 | 41,836,812  | 23    | 7040 | NM_000660.3 | transforming growth factor, beta 1                      | Induction            | 2 | 5   | 4  | 94.1% |
| <i>TGFB2</i>    | 1  | 218,519,391 | 98.6  | 7042 | NM_003238.1 | transforming growth factor, beta 2                      | Induction            | 2 | 57  | 9  | 91.4% |
| <i>TGFB3</i>    | 14 | 76,424,442  | 23.7  | 7043 | NM_003239.1 | transforming growth factor, beta 3                      | Induction            | 2 | 18  | 3  | 94.8% |
| <i>TGFBR1</i>   | 9  | 101,867,412 | 49.1  | 7046 | NM_004612.2 | transforming growth factor, beta receptor 1             | Induction            | 2 | 39  | 4  | 93.4% |
| <i>TGFBR2</i>   | 3  | 30,647,994  | 87.6  | 7048 | NM_003242.5 | transforming growth factor, beta receptor II (70/80kDa) | Induction            | 2 | 112 | 15 | 90.8% |
| <i>TGFBR3</i>   | 1  | 92,145,900  | 205.9 | 7049 | NM_003243.2 | transforming growth factor, beta receptor III           | Induction            | 2 | 255 | 14 | 90.2% |
| <i>TNFRSF18</i> | 1  | 1,128,751   | 3.2   | 8784 | NM_004195.2 | tumor necrosis factor receptor superfamily,             | Suppressive Function | 1 | 5   | 3  | 94.4% |

|                |   |           |     |      |             | member 18                                            |                      |   |   |   |       |
|----------------|---|-----------|-----|------|-------------|------------------------------------------------------|----------------------|---|---|---|-------|
| <i>TNFRSF4</i> | 1 | 1,136,569 | 2.8 | 7293 | NM_003327.2 | tumor necrosis factor receptor superfamily, member 4 | Suppressive Function | 1 | 4 | 3 | 94.4% |
| <i>TNFRSF9</i> | 1 | 7,902,494 | 21  | 3604 | NM_001561.4 | tumor necrosis factor receptor superfamily, member 9 | Suppressive Function | 1 | 8 | 5 | 94.3% |

1. Goode EL, Derycke M, Kalli KR, Oberg AL, Cunningham JM, Maurer MJ, et al. Inherited variants in regulatory T cell genes and outcome of ovarian cancer. *PLoS One*. 2013;8:e53903. 2. Charbonneau B, Moysich KB, Kalli KR, Oberg AL, Vierkant RA, Fogarty ZC, et al. Large-scale evaluation of common variation in regulatory T cell-related genes and ovarian cancer outcome. *Cancer Immunol Res*. 2014;2:332-40, ND=Not determined

**Supplemental Table S2: PC analysis p values examining gene level variation with T cell, Treg infiltration and accompanying ratios**

| Gene          | CD8 <sup>+</sup> | CD4 <sup>+</sup> | CD4 <sup>+</sup> CD25 <sup>+</sup> FOXP3 <sup>+</sup> | CD8 <sup>+</sup> /<br>CD4 <sup>+</sup> | CD8 <sup>+</sup> /<br>CD4 <sup>+</sup> CD25 <sup>+</sup> FOXP3 <sup>+</sup> | CD4 <sup>+</sup> /<br>CD4 <sup>+</sup> CD25 <sup>+</sup> FOXP3 <sup>+</sup> |
|---------------|------------------|------------------|-------------------------------------------------------|----------------------------------------|-----------------------------------------------------------------------------|-----------------------------------------------------------------------------|
| <i>ACVR2B</i> | 0.906            | 0.958            | 0.595                                                 | 0.809                                  | 0.950                                                                       | 0.455                                                                       |
| <i>AGTR1</i>  | 0.731            | 0.224            | 0.067                                                 | 0.439                                  | 0.591                                                                       | 0.362                                                                       |
| <i>CCL11</i>  | 0.0086           | 0.033            | 0.143                                                 | 0.206                                  | 0.706                                                                       | 0.940                                                                       |
| <i>CCL17</i>  | 0.194            | 0.761            | 0.665                                                 | 0.093                                  | 0.528                                                                       | 0.140                                                                       |
| <i>CCL19</i>  | 0.028            | 0.052            | 0.755                                                 | 0.520                                  | 0.048                                                                       | 0.113                                                                       |
| <i>CCL2</i>   | 0.038            | 0.042            | 0.109                                                 | 0.356                                  | 0.902                                                                       | 0.982                                                                       |
| <i>CCL20</i>  | 0.277            | 0.120            | 0.612                                                 | 0.238                                  | 0.996                                                                       | 0.641                                                                       |
| <i>CCL22</i>  | 0.679            | 0.779            | 0.499                                                 | 0.0058                                 | 0.765                                                                       | 0.772                                                                       |
| <i>CCL3</i>   | 0.367            | 0.704            | 0.555                                                 | 0.997                                  | 0.011                                                                       | 0.039                                                                       |
| <i>CCL4</i>   | 0.674            | 0.789            | 0.689                                                 | 0.997                                  | 0.094                                                                       | 0.033                                                                       |
| <i>CCL5</i>   | 0.050            | 0.365            | 0.704                                                 | 0.602                                  | 0.085                                                                       | 0.202                                                                       |
| <i>CCR4</i>   | 0.366            | 0.500            | 0.299                                                 | 0.159                                  | 0.203                                                                       | 0.737                                                                       |
| <i>CCR6</i>   | 0.334            | 0.602            | 0.944                                                 | 0.889                                  | 0.552                                                                       | 0.301                                                                       |
| <i>CCR7</i>   | 0.878            | 0.989            | 0.818                                                 | 0.776                                  | 0.996                                                                       | 0.490                                                                       |
| <i>CCR8</i>   | 0.528            | 0.090            | 0.564                                                 | 0.486                                  | 0.537                                                                       | 0.847                                                                       |
| <i>CD274</i>  | 0.387            | 0.827            | 0.172                                                 | 0.838                                  | 0.232                                                                       | 0.500                                                                       |
| <i>CD28</i>   | 0.134            | 0.029            | 0.509                                                 | 0.828                                  | 0.895                                                                       | 0.103                                                                       |
| <i>CD46</i>   | 0.222            | 0.342            | 0.508                                                 | 0.534                                  | 0.034                                                                       | 0.095                                                                       |
| <i>CD80</i>   | 0.114            | 0.174            | 0.720                                                 | 0.154                                  | 0.486                                                                       | 0.915                                                                       |
| <i>CD86</i>   | 0.700            | 0.189            | 0.876                                                 | 0.251                                  | 0.686                                                                       | 0.510                                                                       |
| <i>CTLA4</i>  | 0.671            | 0.614            | 0.576                                                 | 0.786                                  | 0.293                                                                       | 0.487                                                                       |
| <i>CXCL10</i> | 0.042            | 0.376            | 0.829                                                 | 0.061                                  | 0.549                                                                       | 0.322                                                                       |
| <i>CXCL13</i> | 0.404            | 0.261            | 0.929                                                 | 0.734                                  | 0.562                                                                       | 0.705                                                                       |
| <i>CXCR5</i>  | 0.885            | 0.308            | 0.121                                                 | 0.201                                  | 0.266                                                                       | 0.834                                                                       |
| <i>DUSP4</i>  | 0.231            | 0.070            | 0.205                                                 | 0.476                                  | 0.754                                                                       | 0.770                                                                       |
| <i>EGR2</i>   | 0.821            | 0.347            | 0.146                                                 | 0.423                                  | 0.422                                                                       | 0.063                                                                       |
| <i>FOXP3</i>  | 0.312            | 0.968            | 0.277                                                 | 0.193                                  | 0.227                                                                       | 0.422                                                                       |
| <i>GPR83</i>  | 0.598            | 0.590            | 0.633                                                 | 0.877                                  | 0.732                                                                       | 0.586                                                                       |

|               |       |       |       |       |        |       |
|---------------|-------|-------|-------|-------|--------|-------|
| <i>IDO1</i>   | 0.040 | 0.025 | 0.893 | 0.896 | 0.306  | 0.067 |
| <i>IKZF2</i>  | 0.990 | 0.422 | 0.538 | 0.897 | 0.704  | 0.859 |
| <i>IKZF4</i>  | 0.350 | 0.731 | 0.650 | 0.779 | 0.825  | 0.649 |
| <i>IL10</i>   | 0.589 | 0.112 | 0.203 | 0.381 | 0.0073 | 0.010 |
| <i>IL10RA</i> | 0.373 | 0.327 | 0.621 | 0.360 | 0.533  | 0.812 |
| <i>IL10RB</i> | 0.405 | 0.706 | 0.998 | 0.403 | 0.664  | 0.474 |
| <i>IL15</i>   | 0.529 | 0.586 | 0.299 | 0.346 | 0.364  | 0.946 |
| <i>IL15RA</i> | 0.352 | 0.403 | 0.021 | 0.882 | 0.075  | 0.319 |
| <i>IL17RA</i> | 0.771 | 0.944 | 0.635 | 0.126 | 0.483  | 0.895 |
| <i>IL23A</i>  | 0.804 | 0.457 | 0.571 | 0.790 | 0.745  | 0.878 |
| <i>IL23R</i>  | 0.679 | 0.775 | 0.440 | 0.011 | 0.090  | 0.481 |
| <i>IL2RA</i>  | 0.842 | 0.399 | 0.570 | 0.416 | 0.549  | 0.833 |
| <i>IL2RB</i>  | 0.244 | 0.073 | 0.860 | 0.158 | 0.945  | 0.841 |
| <i>IL6</i>    | 0.366 | 0.126 | 0.395 | 0.467 | 0.791  | 0.546 |
| <i>IL6R</i>   | 0.114 | 0.105 | 0.887 | 0.128 | 0.252  | 0.260 |
| <i>IL6ST</i>  | 0.348 | 0.621 | 0.023 | 0.419 | 0.214  | 0.300 |
| <i>IL8</i>    | 0.773 | 0.063 | 0.661 | 0.694 | 0.695  | 0.017 |
| <i>IL9</i>    | 0.185 | 0.899 | 0.447 | 0.665 | 0.913  | 0.993 |
| <i>INHBA</i>  | 0.091 | 0.209 | 0.496 | 0.219 | 0.057  | 0.312 |
| <i>INHBB</i>  | 0.221 | 0.511 | 0.471 | 0.510 | 0.231  | 0.424 |
| <i>IRF4</i>   | 0.257 | 0.676 | 0.680 | 0.994 | 0.312  | 0.093 |
| <i>ITGAE</i>  | 0.862 | 0.929 | 0.709 | 0.382 | 0.297  | 0.179 |
| <i>KLF10</i>  | 0.716 | 0.604 | 0.778 | 0.957 | 0.338  | 0.265 |
| <i>LAG3</i>   | 0.933 | 0.799 | 0.905 | 0.480 | 0.964  | 0.913 |
| <i>LGALS1</i> | 0.095 | 0.694 | 0.561 | 0.098 | 0.240  | 0.931 |
| <i>LGALS9</i> | 0.136 | 0.199 | 0.733 | 0.902 | 0.886  | 0.747 |
| <i>LRRC32</i> | 0.016 | 0.742 | 0.995 | 0.332 | 0.111  | 0.838 |
| <i>MAP3K8</i> | 0.766 | 0.726 | 0.810 | 0.845 | 0.723  | 0.836 |
| <i>MDFIC</i>  | 0.438 | 0.051 | 0.794 | 0.957 | 0.062  | 0.039 |
| <i>NRP1</i>   | 0.820 | 0.916 | 0.446 | 0.152 | 0.214  | 0.631 |
| <i>PDCD1</i>  | 0.821 | 0.683 | 0.968 | 0.540 | 0.484  | 0.352 |
| <i>PLAGL1</i> | 0.386 | 0.970 | 0.497 | 0.320 | 0.480  | 0.624 |

|                 |       |       |       |       |       |       |
|-----------------|-------|-------|-------|-------|-------|-------|
| <i>PRNP</i>     | 0.575 | 0.908 | 0.577 | 0.628 | 0.590 | 0.091 |
| <i>RGS1</i>     | 0.796 | 0.922 | 0.975 | 0.810 | 0.502 | 0.501 |
| <i>RGS16</i>    | 0.456 | 0.914 | 0.441 | 0.825 | 0.374 | 0.289 |
| <i>SH3BGRL2</i> | 0.620 | 0.555 | 0.743 | 0.265 | 0.723 | 0.914 |
| <i>SLC22A2</i>  | 0.036 | 0.267 | 0.844 | 0.915 | 0.302 | 0.170 |
| <i>SMAD3</i>    | 0.428 | 0.733 | 0.837 | 0.479 | 0.608 | 0.803 |
| <i>SOCS2</i>    | 0.504 | 0.738 | 0.671 | 0.563 | 0.706 | 0.943 |
| <i>STAT5A</i>   | 0.443 | 0.630 | 0.279 | 0.914 | 0.282 | 0.628 |
| <i>STAT5B</i>   | 0.688 | 0.230 | 0.493 | 0.720 | 0.566 | 0.618 |
| <i>TGFB1</i>    | 0.535 | 0.140 | 0.759 | 0.544 | 0.831 | 0.656 |
| <i>TGFB2</i>    | 0.581 | 0.904 | 0.184 | 0.831 | 0.666 | 0.255 |
| <i>TGFB3</i>    | 0.516 | 0.947 | 0.349 | 0.966 | 0.774 | 0.379 |
| <i>TGFBR1</i>   | 0.107 | 0.317 | 0.365 | 0.429 | 0.846 | 0.904 |
| <i>TGFBR2</i>   | 0.890 | 0.332 | 0.134 | 0.678 | 0.391 | 0.184 |
| <i>TGFBR3</i>   | 0.843 | 0.667 | 0.127 | 0.200 | 0.275 | 0.176 |
| <i>TNFRSF18</i> | 0.527 | 0.452 | 0.864 | 0.068 | 0.787 | 0.337 |
| <i>TNFRSF4</i>  | 0.485 | 0.139 | 0.416 | 0.670 | 0.400 | 0.083 |
| <i>TNFRSF9</i>  | 0.425 | 0.197 | 0.339 | 0.098 | 0.962 | 0.746 |
